# Supplementary material for: Influence of the Backward Fall Technique on the Transverse Linear Acceleration of the Head during the Fall
Source: MDPI journal article supplement (doi:10.3390/s23063276), 2023-03-20
Supplement: s1 [file s1]

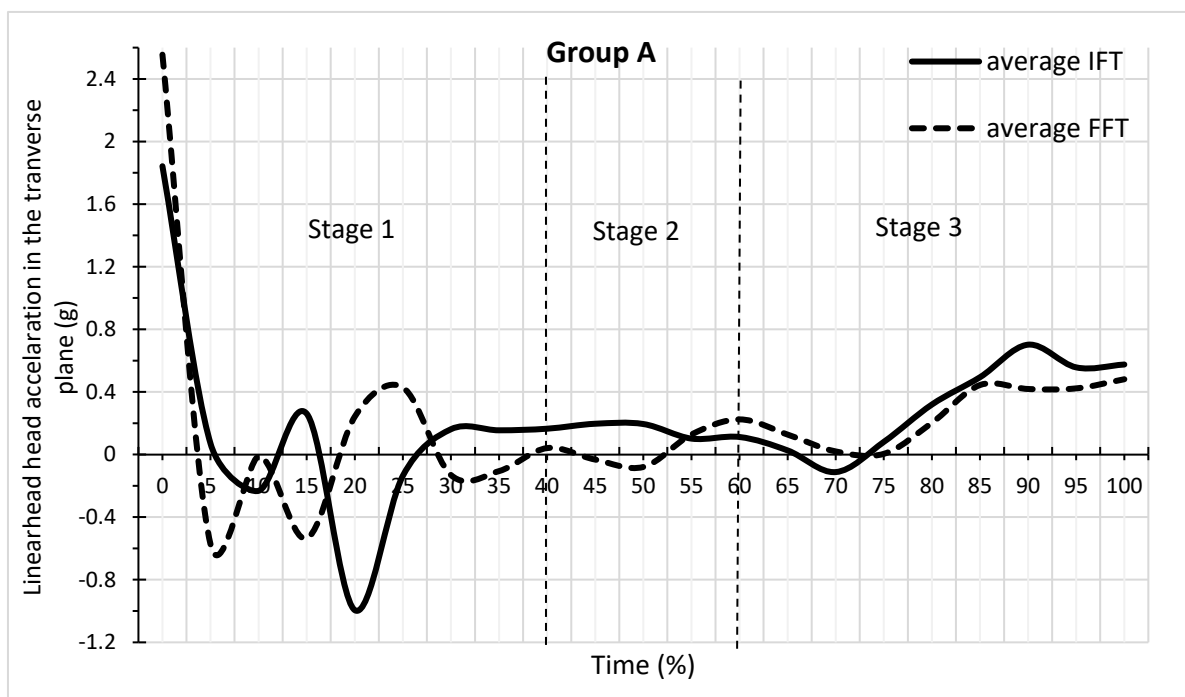

**Figure S1.** Dependence of mean values of linear head acceleration in the transverse plane on the time of performing a backward fall in the form of IFT and FFT in group A, which consisted of students training martial arts (from Table 1).

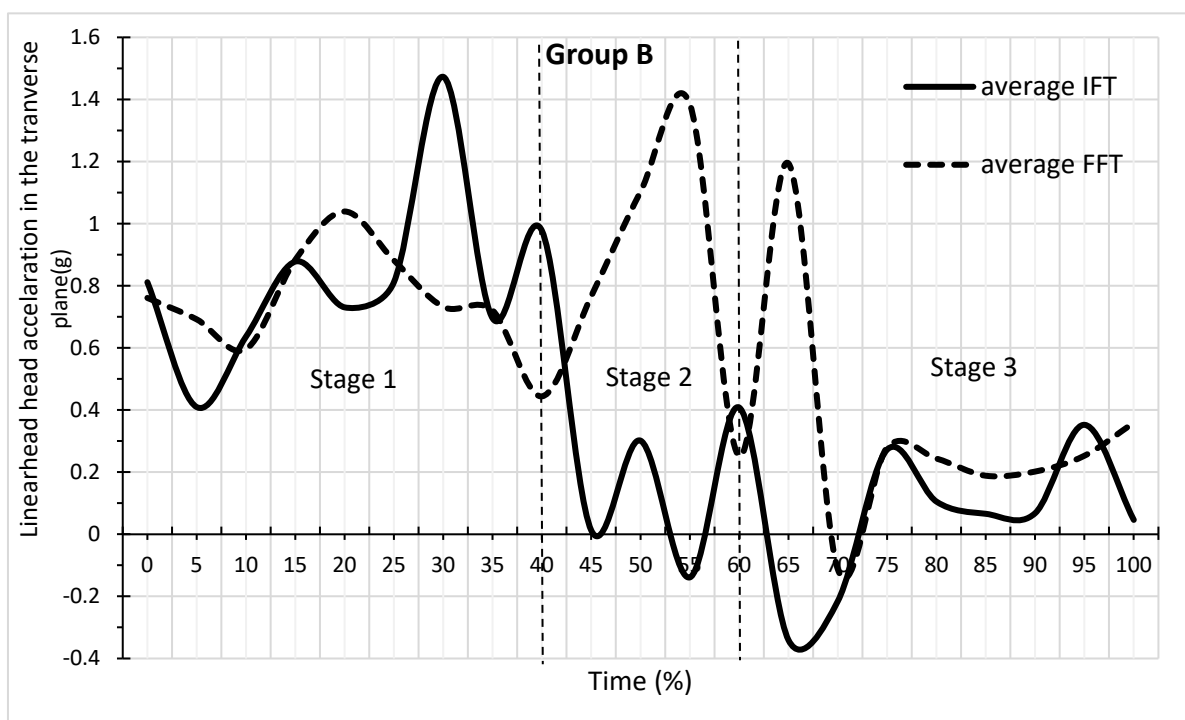

**Figure S2.** Dependence of mean values of linear head acceleration in the transverse plane on the time of performing a backward fall in the form of IFT and FFT in group B, which consisted of students who played handball (from Table 2).

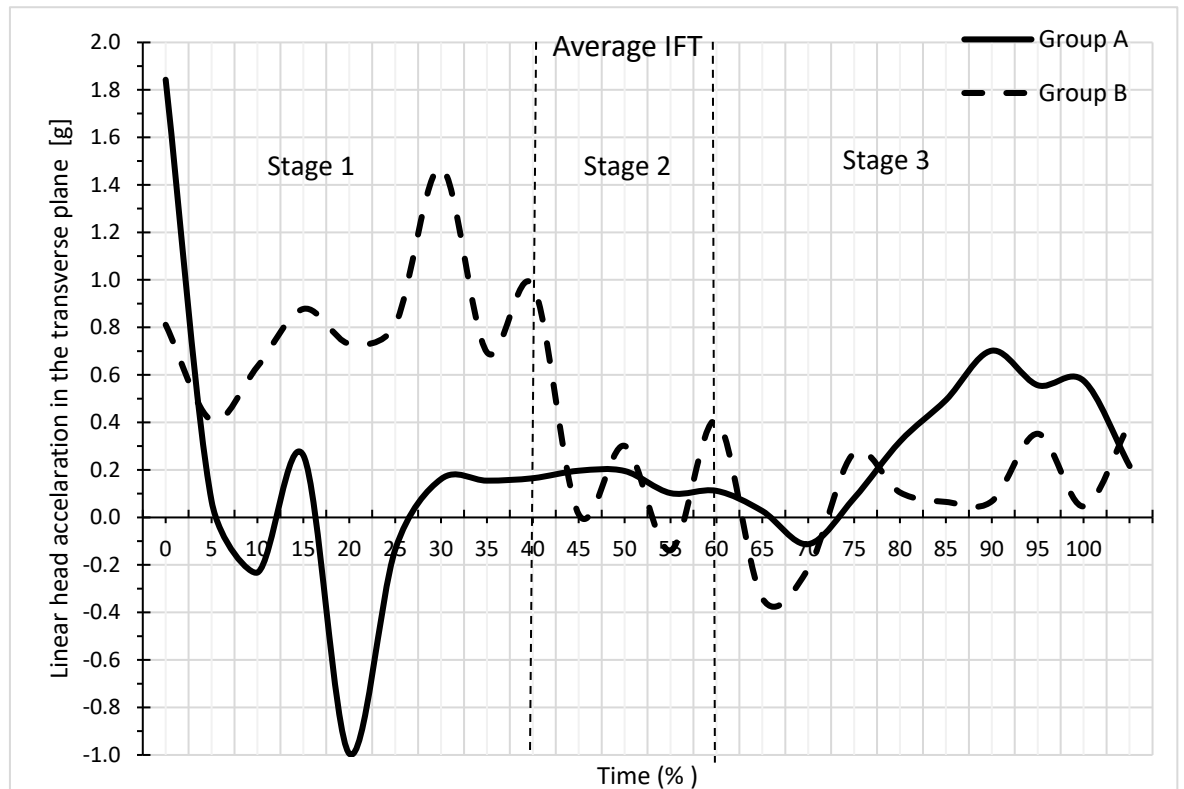

**Figure S3.** Dependence of mean values of linear head acceleration in the transverse plane at the time of performing a backward fall in the form of IFT between groups A and B (from Table 1 and Table 2).

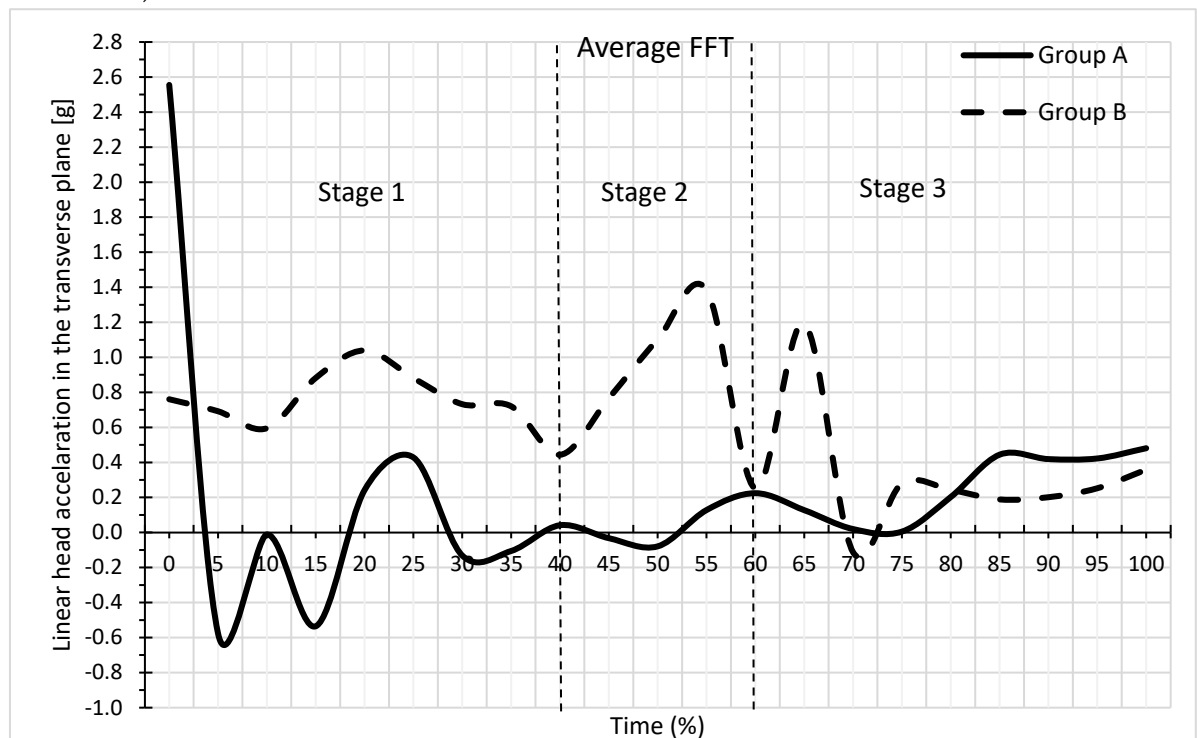

**Figure S4.** Dependence of mean values of linear head acceleration in the transverse plane at the time of performing a backward fall in the form of FFT between groups A and B (from Table 1 and Table 2).

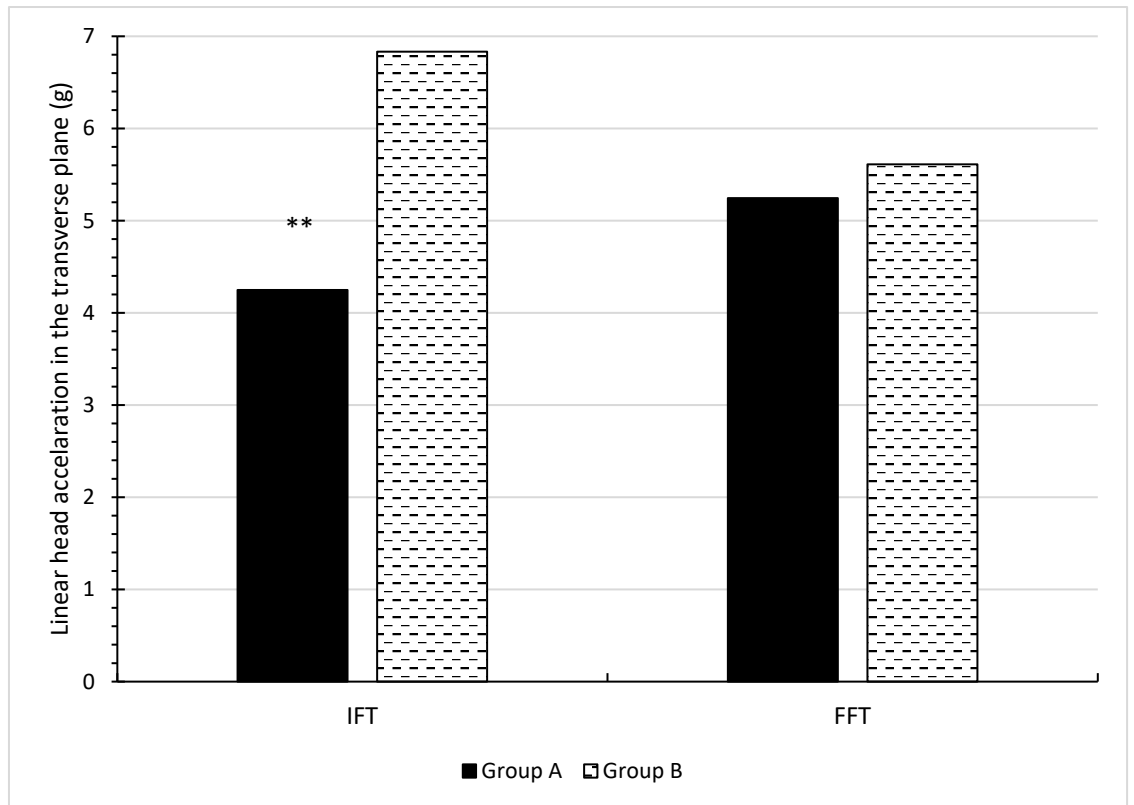

**Figure S5.** Comparison mean delta values for IFT and FFT between groups A and B (\*\* means a significant difference between the mean values provided at the significance level 0.01 (from Table 6).

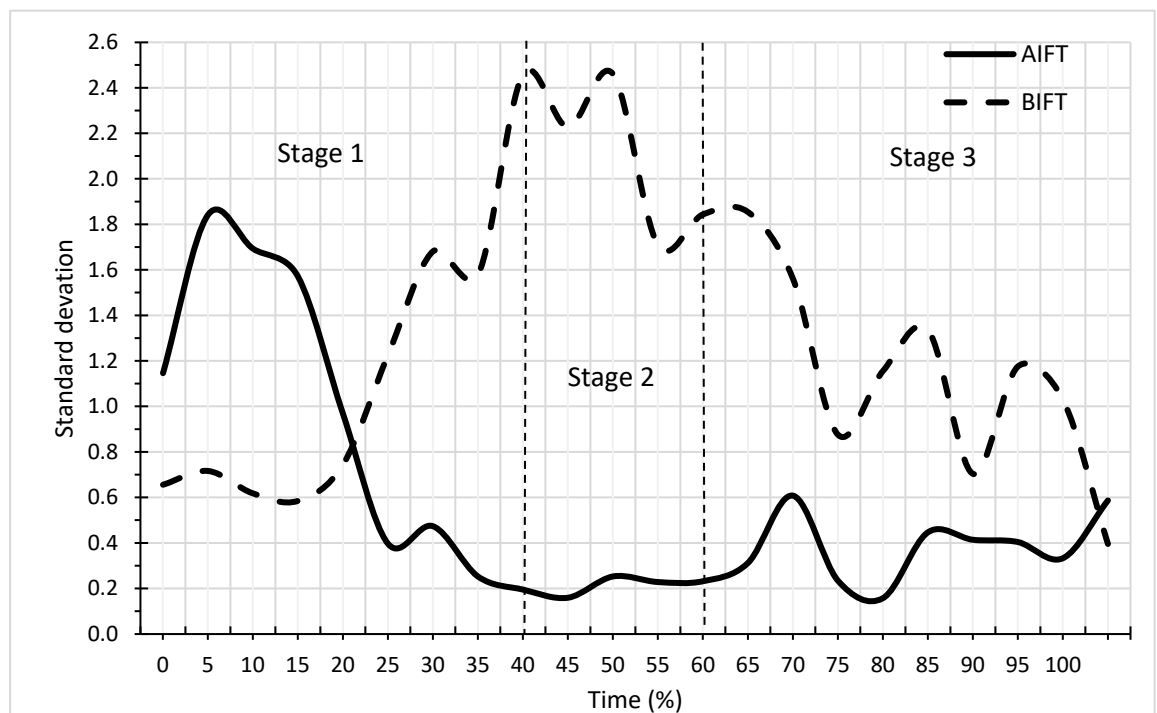

**Figure S6.** Dependence of the standard deviations on the time of performing a backward fall for FFT in groups A and B (from Table 7).

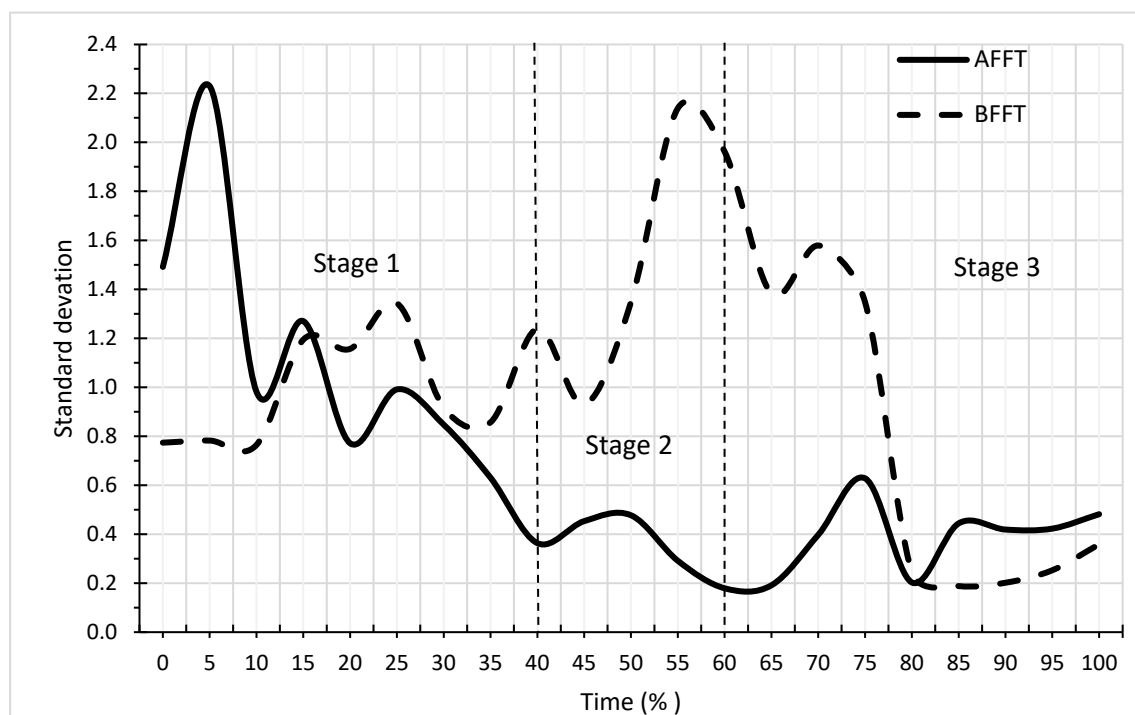

**Figure S7.** Dependence of the standard deviations on the time of performing a backward fall for FFT in groups A and B (from Table 8).
